# Supplementary material for: Beyond helium: hydrogen as a carrier gas in multiresidue pesticide analysis in fruits and vegetables by GC-MS/MS
Source: Royal Society of Chemistry journal article supplement (doi:10.1039/d3ay02119j), 2024-01-01
Supplement: d3ay02119j1.pdf [file d3ay02119j1.pdf]

Supplementary Table S1: Mass spectrometry parameters and instrumental limits of quantification of the 150 pesticides included in the multiresidue method.

| Compound             | RT    | Target m/z    | CE1 | Ref. m/z      | CE2 | Instrumental LOQ (µg/Kg) |        |          |
|----------------------|-------|---------------|-----|---------------|-----|--------------------------|--------|----------|
|                      |       |               |     |               |     | Tomato                   | Pepper | Zucchini |
| (E)-Chlorfenvinphos  | 5.94  | 323.00>267.00 | 16  | 267.00>159.00 | 18  | 5                        | 10     | 5        |
| (E)-Pyrifenox        | 5.88  | 262.00>91.00  | 16  | 262.00>227.00 | 10  | 5                        | 10     | 10       |
| (Z)-Pyrifenox        | 6.19  | 262.00>91.00  | 16  | 262.00>227.00 | 10  | 10                       | 10     | 20       |
| 2-Phenylphenol       | 3.35  | 170.10>141.10 | 24  | 170.10>115.10 | 28  | 2                        | 5      | 5        |
| Acrinathrin          | 8.87  | 181.10>152.10 | 26  | 289.10>93.00  | 14  | 5                        | 5      | 5        |
| Alachlor             | 5.03  | 160.10>132.10 | 10  | 188.10>160.10 | 10  | 2                        | 5      | 5        |
| alpha-Endosulfan     | 6.27  | 194.90>160.00 | 8   | 194.90>125.00 | 24  | 5                        | 5      | 5        |
| Ametryn              | 5.04  | 227.10>185.10 | 6   | 227.10>170.10 | 14  | 2                        | 2      | 2        |
| Anthraquinone        | 5.42  | 180.10>152.10 | 14  | 208.10>180.10 | 10  | 2                        | 2      | 2        |
| Atrazine             | 4.23  | 215.10>173.10 | 6   | 200.10>104.10 | 18  | 2                        | 2      | 5        |
| Benalaxyl            | 7.37  | 148.10>105.10 | 16  | 148.10>79.10  | 24  | 10                       | 5      | 20       |
| beta-Endosulfan      | 6.94  | 194.90>160.00 | 8   | 194.90>125.00 | 24  | 5                        | 2      | 5        |
| Bifenox              | 8.27  | 340.90>309.90 | 10  | 309.90>188.90 | 12  | 20                       | 50     | 10       |
| Bifenthrin           | 8.10  | 181.10>166.10 | 12  | 181.10>179.10 | 12  | 2                        | 2      | 2        |
| Boscalid             | 9.84  | 140.10>112.10 | 12  | 140.10>76.00  | 24  | 2                        | 2      | 2        |
| Bromopropylate       | 8.07  | 340.90>182.90 | 18  | 340.90>184.90 | 20  | 2                        | 5      | 10       |
| Bupirimate           | 6.72  | 273.10>108.10 | 16  | 273.10>193.10 | 8   | 2                        | 5      | 5        |
| Buprofezin           | 6.66  | 172.10>57.00  | 14  | 175.10>132.10 | 12  | 5                        | 2      | 10       |
| Butralin             | 5.65  | 266.10>190.10 | 12  | 266.10>236.10 | 8   | 5                        | 5      | 5        |
| Cadusafos            | 3.96  | 158.90>130.90 | 8   | 158.90>97.00  | 18  | 2                        | 2      | 2        |
| Carbophenothion      | 7.34  | 157.00>45.00  | 18  | 341.90>157.00 | 14  | 5                        | 5      | 5        |
| Chinomethionat       | 6.11  | 234.00>206.00 | 8   | 206.00>148.00 | 16  | 2                        | 5      | 2        |
| Chlorfenapyr         | 6.86  | 247.10>227.00 | 16  | 247.10>200.00 | 24  | 20                       | 20     | 20       |
| Chlorobenzilate      | 6.93  | 139.00>111.00 | 16  | 251.00>139.00 | 14  | 2                        | 2      | 2        |
| Chlorothalonil       | 4.62  | 263.90>168.00 | 24  | 263.90>228.80 | 18  | 2                        | 2      | 5        |
| Chlorpropham         | 3.80  | 127.10>65.00  | 22  | 213.10>171.10 | 6   | 2                        | 2      | 2        |
| Chlorpyrifos         | 5.47  | 196.90>168.90 | 14  | 313.90>257.90 | 14  | 2                        | 2      | 2        |
| Chlorpyrifos-methyl  | 4.95  | 285.90>93.00  | 22  | 285.90>270.90 | 14  | 2                        | 2      | 2        |
| Chlorthal-dimethyl   | 5.53  | 298.90>220.90 | 24  | 300.90>222.90 | 26  | 2                        | 2      | 2        |
| Chlozolate           | 5.89  | 258.90>188.00 | 14  | 330.90>258.90 | 6   | 5                        | 2      | 5        |
| cis-Chlordane        | 6.30  | 374.80>265.90 | 26  | 372.80>263.90 | 28  | 2                        | 2      | 2        |
| Coumaphos            | 9.35  | 362.00>109.00 | 16  | 362.00>226.00 | 14  | 5                        | 10     | 10       |
| Cyfluthrin           | 9.66  | 163.10>127.10 | 6   | 163.10>91.00  | 14  | 5                        | 10     | 10       |
| Cyhalothrin          | 8.74  | 208.00>181.00 | 8   | 197.00>141.00 | 12  | 2                        | 5      | 5        |
| Cypermethrin         | 9.80  | 163.10>127.10 | 6   | 163.10>91.00  | 14  | 10                       | 10     | 10       |
| Cyproconazole        | 6.83  | 139.10>111.10 | 16  | 222.10>125.10 | 24  | 10                       | 5      | 5        |
| Cyprodinil           | 5.76  | 224.10>208.10 | 16  | 224.10>197.10 | 22  | 2                        | 2      | 2        |
| Deltamethrin         | 11.24 | 180.90>151.90 | 22  | 252.90>171.90 | 8   | 10                       | 10     | 20       |
| Diazinon             | 4.46  | 304.10>179.10 | 10  | 179.10>137.10 | 18  | 2                        | 2      | 2        |
| Dichlofluanid        | 5.33  | 223.90>123.10 | 8   | 167.10>124.10 | 10  | 2                        | 2      | 5        |
| Dichlorvos           | 2.48  | 109.00>79.00  | 8   | 185.00>93.00  | 14  | 2                        | 2      | 2        |
| Dichlorvos-d6 (ISTD) | 2.47  | 191.10>99.00  | 16  | 191.10>115.00 | 16  | 2                        | 2      | 2        |
| Diclobutrazol        | 6.68  | 270.00>159.00 | 14  | 272.00>161.00 | 14  | 10                       | 10     | 5        |
| Dicofol deg. (DCBP)  | 5.51  | 139.00>111.00 | 16  | 139.00>75.00  | 28  | 5                        | 2      | 2        |
| Dieldrin             | 6.57  | 276.90>241.00 | 8   | 262.90>193.00 | 34  | 5                        | 2      | 2        |

|                               |       |               |    |               |    |    |    |    |
|-------------------------------|-------|---------------|----|---------------|----|----|----|----|
| Diethofencarb                 | 5.40  | 225.10>168.10 | 12 | 267.10>225.10 | 8  | 5  | 2  | 2  |
| Dimethenamid (Dimethenamid-P) | 4.88  | 230.00>154.10 | 10 | 203.00>126.10 | 22 | 2  | 2  | 2  |
| Dimethipin                    | 4.25  | 124.00>76.00  | 8  | 118.00>58.00  | 6  | 5  | 5  | 20 |
| Diphenylamine                 | 3.71  | 167.10>139.10 | 28 | 169.10>66.00  | 24 | 2  | 2  | 2  |
| Endrin                        | 6.94  | 262.90>191.00 | 30 | 262.90>193.00 | 28 | 20 | 20 | 10 |
| EPN                           | 8.08  | 169.10>140.90 | 8  | 156.90>77.00  | 24 | 5  | 5  | 2  |
| Epoxiconazole                 | 7.84  | 192.00>138.00 | 14 | 192.00>111.00 | 26 | 5  | 5  | 5  |
| Esfenvalerate                 | 10.70 | 225.10>119.10 | 20 | 225.10>147.10 | 10 | 5  | 2  | 5  |
| Ethion                        | 7.09  | 153.00>97.00  | 14 | 230.90>129.00 | 24 | 5  | 5  | 5  |
| Ethofumesate                  | 5.27  | 207.10>161.10 | 8  | 207.10>179.10 | 6  | 2  | 2  | 2  |
| Ethoprophos                   | 3.74  | 200.00>158.00 | 6  | 158.00>114.00 | 8  | 2  | 2  | 2  |
| Etofenprox                    | 10.01 | 163.10>135.10 | 10 | 163.10>107.10 | 18 | 2  | 2  | 2  |
| Etrimfos                      | 4.61  | 181.10>153.10 | 10 | 292.10>181.10 | 8  | 5  | 5  | 5  |
| Fenamidone                    | 8.24  | 238.10>103.10 | 22 | 268.10>180.10 | 16 | 2  | 2  | 5  |
| Fenarimol                     | 8.82  | 251.00>139.00 | 14 | 251.00>111.00 | 26 | 2  | 2  | 10 |
| Fenazaquin                    | 8.25  | 160.20>145.10 | 8  | 145.20>115.10 | 24 | 5  | 5  | 10 |
| Fenbuconazole                 | 9.59  | 198.10>129.10 | 10 | 129.10>102.10 | 18 | 5  | 2  | 2  |
| Fenitrothion                  | 5.24  | 277.00>260.00 | 6  | 260.00>125.10 | 12 | 5  | 5  | 5  |
| Fenpropathrin                 | 8.17  | 181.10>152.10 | 22 | 265.10>210.10 | 12 | 2  | 2  | 2  |
| Fenpropimorph                 | 5.58  | 128.10>70.00  | 10 | 128.10>110.10 | 8  | 2  | 2  | 5  |
| Fenthion                      | 5.45  | 278.00>109.00 | 20 | 278.00>169.00 | 14 | 5  | 5  | 10 |
| Fenvalerate                   | 10.52 | 225.10>119.10 | 20 | 225.10>147.10 | 10 | 5  | 2  | 10 |
| Fipronil                      | 6.00  | 366.90>212.90 | 30 | 368.90>214.90 | 30 | 10 | 5  | 10 |
| Flamprop-methyl               | 6.65  | 230.00>170.00 | 18 | 276.10>105.00 | 10 | 5  | 5  | 5  |
| Fluazifop-P-butyl             | 6.83  | 282.10>91.00  | 18 | 282.10>238.10 | 18 | 2  | 2  | 5  |
| Flucythrinate                 | 9.96  | 199.10>157.10 | 10 | 157.10>107.10 | 12 | 10 | 10 | 10 |
| Fludioxonil                   | 6.56  | 248.00>127.00 | 26 | 248.00>154.00 | 20 | 10 | 5  | 10 |
| Fluquinconazole               | 9.35  | 340.00>298.00 | 20 | 340.00>313.00 | 14 | 2  | 5  | 5  |
| Flusilazole                   | 6.68  | 233.10>165.10 | 14 | 206.10>151.10 | 16 | 10 | 5  | 5  |
| Flutolanil                    | 6.44  | 173.00>145.00 | 14 | 281.10>173.00 | 12 | 2  | 5  | 2  |
| Flutriafol                    | 6.35  | 219.10>123.10 | 14 | 219.10>95.00  | 28 | 5  | 5  | 2  |
| Folpet                        | 6.02  | 259.90>130.00 | 14 | 261.90>130.00 | 18 | 5  | 50 | 50 |
| Fonofos                       | 4.42  | 137.10>109.10 | 8  | 246.00>137.10 | 6  | 2  | 2  | 2  |
| Formothion                    | 4.74  | 170.00>93.00  | 8  | 224.00>125.00 | 18 | 5  | 2  | 2  |
| gamma-BHC (Lindane)           | 4.36  | 180.90>144.90 | 16 | 218.90>182.90 | 8  | 2  | 2  | 2  |
| Heptachlor                    | 5.05  | 271.80>236.90 | 20 | 273.80>238.90 | 16 | 2  | 2  | 2  |
| Hexachlorobenzene             | 4.14  | 283.80>248.80 | 24 | 283.80>213.80 | 28 | 2  | 2  | 2  |
| Iprodione                     | 7.97  | 314.00>245.00 | 12 | 316.00>247.00 | 12 | 10 | 10 | 10 |
| Isazofos                      | 4.59  | 257.00>162.00 | 8  | 257.00>119.00 | 18 | 2  | 2  | 2  |
| Isofenphos-methyl             | 5.76  | 199.00>121.00 | 14 | 241.10>121.10 | 22 | 2  | 2  | 2  |
| Isoprothiolane                | 6.48  | 231.10>189.00 | 10 | 290.10>118.00 | 14 | 10 | 5  | 5  |
| Kresoxim-methyl               | 6.71  | 206.10>131.10 | 14 | 206.10>116.10 | 6  | 5  | 5  | 5  |
| lambda-Cyhalothrin            | 8.74  | 181.10>152.10 | 24 | 163.10>127.00 | 14 | 10 | 5  | 2  |
| Malathion                     | 5.34  | 173.10>99.00  | 14 | 173.10>127.00 | 6  | 2  | 2  | 2  |
| Mepanipyrim                   | 6.29  | 222.10>221.10 | 6  | 223.10>222.10 | 10 | 2  | 5  | 5  |
| Metalaxyl (Mefenoxam)         | 5.08  | 206.10>132.10 | 20 | 249.20>190.10 | 8  | 10 | 10 | 10 |
| Metazachlor                   | 5.83  | 133.10>117.10 | 24 | 209.10>132.10 | 18 | 2  | 5  | 5  |
| Methidathion                  | 6.13  | 145.00>85.00  | 8  | 145.00>58.00  | 14 | 5  | 2  | 2  |
| Metolachlor (S-Metolachlor)   | 5.43  | 162.10>133.10 | 16 | 238.10>162.10 | 12 | 2  | 2  | 2  |

|                   |       |               |    |               |    |    |    |    |
|-------------------|-------|---------------|----|---------------|----|----|----|----|
| Mevinphos         | 3.01  | 127.00>109.00 | 12 | 192.00>127.00 | 12 | 2  | 2  | 2  |
| Molinate          | 3.41  | 126.10>55.00  | 14 | 187.10>126.10 | 6  | 2  | 2  | 5  |
| Myclobutanil      | 6.66  | 179.10>125.00 | 14 | 179.10>152.00 | 8  | 5  | 5  | 10 |
| Nitrofen          | 6.80  | 202.00>139.00 | 24 | 282.90>253.00 | 12 | 2  | 5  | 10 |
| o,p'-DDE          | 6.18  | 246.00>176.00 | 30 | 248.00>176.00 | 28 | 2  | 2  | 2  |
| o,p'-DDT          | 7.07  | 235.00>165.00 | 24 | 237.00>165.00 | 28 | 2  | 2  | 2  |
| Oxadixyl          | 7.10  | 163.10>132.10 | 8  | 163.10>117.10 | 24 | 10 | 10 | 10 |
| p,p'-DDD          | 7.04  | 235.00>165.00 | 24 | 237.00>165.00 | 28 | 2  | 2  | 2  |
| p,p'-DDE          | 6.55  | 246.00>176.00 | 30 | 317.90>248.00 | 24 | 2  | 2  | 2  |
| Paclobutrazol     | 6.21  | 236.10>125.00 | 14 | 236.10>167.00 | 10 | 10 | 10 | 10 |
| Parathion-methyl  | 5.10  | 125.00>47.00  | 12 | 125.00>79.00  | 8  | 2  | 2  | 2  |
| Pebulate          | 3.13  | 128.10>57.00  | 6  | 128.10>72.00  | 4  | 5  | 2  | 5  |
| Penconazole       | 5.86  | 248.10>157.10 | 26 | 159.10>123.10 | 22 | 2  | 5  | 2  |
| Pendimethalin     | 5.83  | 252.10>162.10 | 10 | 252.10>191.10 | 8  | 2  | 5  | 2  |
| Permethrin        | 9.20  | 183.10>153.10 | 14 | 183.10>165.10 | 14 | 10 | 5  | 10 |
| Phenothrin        | 8.41  | 123.10>81.00  | 8  | 183.10>168.10 | 14 | 20 | 50 | 50 |
| Phenthoate        | 5.97  | 273.90>125.00 | 20 | 273.90>246.00 | 6  | 5  | 5  | 2  |
| Phorate           | 4.00  | 231.00>129.00 | 24 | 231.00>175.00 | 12 | 2  | 5  | 5  |
| Picolinafen       | 8.10  | 376.10>239.10 | 12 | 238.10>145.10 | 24 | 10 | 10 | 5  |
| Pirimicarb        | 4.72  | 238.10>166.10 | 12 | 166.10>96.00  | 18 | 5  | 2  | 2  |
| Pirimiphos-methyl | 5.25  | 290.10>125.00 | 22 | 290.10>233.10 | 12 | 2  | 5  | 2  |
| Procymidone       | 6.05  | 283.00>96.00  | 10 | 285.00>96.00  | 10 | 2  | 2  | 2  |
| Profenofos        | 6.51  | 338.90>268.90 | 18 | 336.90>266.90 | 14 | 10 | 10 | 10 |
| Prometryn         | 5.07  | 226.10>184.10 | 10 | 241.20>184.10 | 12 | 2  | 2  | 5  |
| Propaphos         | 6.15  | 220.10>140.10 | 12 | 220.10>125.10 | 24 | 5  | 10 | 10 |
| Propiconazole     | 7.51  | 173.00>145.00 | 16 | 173.00>109.00 | 28 | 10 | 2  | 5  |
| Propyzamide       | 4.40  | 172.90>144.90 | 16 | 172.90>109.00 | 26 | 2  | 2  | 2  |
| Pyraclostrobin    | 10.56 | 132.10>77.00  | 20 | 164.10>132.10 | 14 | 5  | 10 | 10 |
| Pyridaben         | 9.29  | 147.10>117.10 | 22 | 147.10>132.10 | 14 | 2  | 5  | 5  |
| Pyrimethanil      | 4.45  | 198.10>183.10 | 14 | 198.10>118.10 | 28 | 2  | 2  | 2  |
| Pyriproxyfen      | 8.55  | 136.10>78.00  | 20 | 226.10>186.10 | 14 | 5  | 5  | 10 |
| Quinalphos        | 5.97  | 146.10>118.00 | 10 | 157.10>129.00 | 14 | 5  | 2  | 50 |
| Quinoxifen        | 7.40  | 237.10>208.10 | 28 | 307.10>237.10 | 22 | 2  | 2  | 2  |
| Quintozene        | 4.40  | 264.80>236.80 | 10 | 294.80>236.80 | 16 | 2  | 2  | 2  |
| Sulfotep          | 3.94  | 322.00>202.00 | 10 | 322.00>294.00 | 4  | 2  | 2  | 2  |
| Sulprofos         | 7.22  | 156.00>141.00 | 18 | 322.00>156.00 | 8  | 10 | 10 | 20 |
| tau-Fluvalinate   | 10.70 | 250.10>55.00  | 18 | 250.10>200.10 | 16 | 10 | 5  | 10 |
| Tebuconazole      | 7.65  | 125.10>89.00  | 18 | 250.10>125.10 | 22 | 5  | 5  | 10 |
| Tebufenpyrad      | 8.22  | 333.10>171.10 | 20 | 333.10>276.10 | 8  | 5  | 5  | 2  |
| Tefluthrin        | 4.55  | 177.00>127.10 | 16 | 177.00>137.10 | 16 | 2  | 2  | 2  |
| Terbufos          | 4.37  | 231.00>128.90 | 26 | 231.00>174.90 | 14 | 2  | 2  | 5  |
| Terbutryn         | 5.21  | 241.20>185.10 | 6  | 241.20>170.10 | 14 | 2  | 2  | 2  |
| Tetrachlorvinphos | 6.26  | 328.90>109.00 | 20 | 330.90>109.00 | 22 | 5  | 2  | 5  |
| Tetraconazole     | 5.58  | 336.00>204.00 | 28 | 336.00>218.00 | 14 | 5  | 5  | 2  |
| Tetradifon        | 8.39  | 226.90>199.00 | 16 | 355.90>228.90 | 12 | 5  | 5  | 10 |
| Tetramethrin      | 8.10  | 164.10>107.10 | 14 | 164.10>135.10 | 8  | 5  | 5  | 20 |
| Thiobencarb       | 5.36  | 125.00>89.00  | 18 | 257.10>100.00 | 8  | 2  | 2  | 2  |
| Tolclofos-methyl  | 5.00  | 264.90>249.90 | 14 | 264.90>219.90 | 22 | 2  | 2  | 2  |
| Tolylfluanid      | 5.90  | 238.00>137.10 | 14 | 181.10>138.10 | 10 | 5  | 2  | 5  |

|                 |      |               |    |               |    |    |    |    |
|-----------------|------|---------------|----|---------------|----|----|----|----|
| TPP (ISTD)      | 7.71 | 215.10>168.10 | 16 | 325.10>169.10 | 20 | 5  | 2  | 2  |
| trans-Chlordane | 6.12 | 374.80>265.90 | 26 | 372.80>263.90 | 28 | 2  | 2  | 2  |
| Triadimefon     | 5.51 | 208.10>181.00 | 10 | 208.10>111.00 | 22 | 2  | 5  | 2  |
| Triazophos      | 7.25 | 161.00>134.00 | 8  | 161.00>106.00 | 14 | 10 | 5  | 20 |
| Trifloxystrobin | 7.48 | 222.10>190.10 | 4  | 222.10>162.10 | 10 | 10 | 10 | 5  |
| Trifluralin     | 3.88 | 306.10>264.10 | 8  | 264.10>160.10 | 18 | 2  | 2  | 2  |
| Vinclozolin     | 4.95 | 212.00>172.00 | 16 | 285.00>212.00 | 12 | 2  | 2  | 2  |
